# Supplementary material for: Systems biological assessment of human immunity to BNT162b2 mRNA vaccination
Source: Res Sq. 2021 Apr 22:rs.3.rs-438662. Preprint. [Version 1] doi: 10.21203/rs.3.rs-438662/v1 (PMC8132234; doi:10.21203/rs.3.rs-438662/v1)
Supplement: Supplement 1 [file 7b71b08952faa9176d3386e7.xlsx]

## Sheet: SuppTable1
pathway	pval	padj	ES	NES	size	leadingEdge	comparison
targets of FOSL1/2 (M0)	0.00276243	0.0366932	-0.973852	-1.48829	2	THBD|MMP9	BL_vs_Day1
cell cycle and transcription (M4.0)	0.0046729	0.0484813	0.273045	1.41922	225	ASGR1|RFC3|GINS4|EPB41L3|MAFB|NDC80|LGALS2|CD1D|PRIM1|ASGR2|GINS2|UBE2C|SPAG5|AIF1|CDT1|CD86|ALDH2|FXYD6|MS4A6A|CENPW|CKS1B|TFEC|MYOF|AURKA|CENPK|MKI67|UBE2S|KYNU|C1orf112|RIN2|CDCA7|PLXNB2|LMO2|PLK1|HNMT|CPVL|CST3|APOBEC3A|CYBB|TPX2|CSTA|KLF4|KIF20B|KCTD12|CEACAM8|MTMR11|CDC20|CTSH|CLEC4A|CD33|FCGR1B|EZH2|RASSF4|SORT1|CD36|TYMP|FCGR1A|PCNA|LILRB1|VCAN|CKS2|DONSON|PTTG1|SLC7A7|SECTM1	BL_vs_Day1
enriched in monocytes (II) (M11.0)	0.00208768	0.0366932	-0.344873	-1.59581	177	SGK1|VNN2|VNN3|QPCT|FCAR|ANPEP|SULF2|NLRP12|TLR2|AQP9|FPR2|RBM47|CRISPLD2|GCA|MEGF9|PYGL|CHST15|CD302|ALOX5|SIRPA|GLT1D1|TREM1|BST1|CSF2RA|SIGLEC9|PLXDC2|C5AR1|LAT2|TLR4|SLC11A1|ITGAX|PADI2|CSF3R|TLR5|IFNGR2|SIGLEC7|FCGR2A|PTAFR|NLRP3|ITGAM|SIRPB1|TLR8|SYK|IRAK3|FPR1|IL13RA1|PLBD1|RBP7|TBXAS1|IMPA2|MNDA	BL_vs_Day1
TLR and inflammatory signaling (M16)	0.00238663	0.0366932	-0.727392	-2.6538	43	TLR6|FCAR|ANPEP|TLR2|AQP9|FPR2|MGAM|TLR1|NPL|WDFY3|ALOX5|PADI4|BST1|KCNJ15|SIGLEC9|C5AR1|TLR4|ITGAX|DYSF|NCF4|CSF3R|TLR5|CXCR2|TLR8|IRAK3|FPR1	BL_vs_Day1
platelet activation (II) (M32.1)	0.00247525	0.0366932	-0.626359	-1.94107	21	ACTN4|DNM2|TLN1|NBEAL2|EHMT2|MAP7D1|FLNA|ZYX|PNPLA6|HGS|MLF2|ACAP1|PKN1|SIPA1|GNB2|AKT1|AP2M1|GNAI2	BL_vs_Day1
immune activation - generic cluster (M37.0)	0.00201613	0.0366932	-0.437885	-2.10418	254	STEAP4|MANSC1|SGK1|PROK2|ACSL1|VNN2|CR1|QPCT|FCAR|ANPEP|VNN1|CDK14|SULF2|AQP9|FPR2|F5|IL18RAP|BMX|CA4|SLC40A1|HAL|CRISPLD2|MGAM|PTGS2|CXCL1|MEGF9|IL1R1|PYGL|LIN7A|BCL6|TLR1|CD177|MMP9|DOCK5|FGD4|TM6SF1|CSE1L|IL1R2|SLCO4C1|BASP1|ROPN1L|TREM1|CD72|UNG|BST1|FKBP14|CREB5|BANK1|CMTM2|ANXA3|KCNJ15|ARAP3|SIGLEC9|PLXDC2|LAT2|PADI2|DYSF|MCTP1|FCGR3B|ENTPD1|DOK3|RASGRP4|NCF4|ACTN1|FOLR3|TLR5|TCL1A|CXCR2|S1…	BL_vs_Day1
enriched in neutrophils (I) (M37.1)	0.00230947	0.0366932	-0.797181	-2.95097	44	MME|STEAP4|MANSC1|PROK2|VNN2|VNN3|NLRP12|FPR2|MGAM|PYGL|LIN7A|REPS2|DGAT2|CXCR1|ALPL|GLT1D1|BASP1|TREM1|TNFRSF10C|CREB5|CMTM2|KCNJ15|C5AR1|FCGR3B|NCF4|KRT23|MXD1|CSF3R|S100P|FCGR2A|PTAFR|LRG1|FPR1	BL_vs_Day1
enriched in B cells (I) (M47.0)	0.00235294	0.0366932	-0.718661	-2.62835	41	RALGPS2|IGHD|FCRL2|PLEKHG1|CD72|BANK1|FCRL5|ADAM28|MS4A1|KLHL14|BLK|FCRL1|AFF3|IGHM|TCL1A|PAX5|TCF4|EBF1|FCER2|P2RX5|TSPAN13|CD79B|VPREB3|FCRLA|SPIB|CD79A|PCDH9|CD200|CR2	BL_vs_Day1
enriched in B cells (II) (M47.1)	0.00239234	0.0366932	-0.631455	-2.19871	34	CDK14|RALGPS2|KLF8|PLEKHG1|CD180|BANK1|FCRL5|MS4A1|KLHL14|IGHM|TCL1A|PAX5|TCF4|EBF1|CD79B|FCRLA|CD79A|TPD52|CR2	BL_vs_Day1
enriched in B cells (III) (M47.2)	0.00501253	0.0489459	-0.56015	-1.74808	22	CDK14|IGHD|ALOX5|CD180|FCRL5|VPREB3|FCRLA|FCRL3|TPD52	BL_vs_Day1
CD1 and other DC receptors (M50)	0.0026178	0.0366932	-0.832324	-1.93327	8	ANPEP|IL1R1|IL1R2|CSF2RA|CD1A	BL_vs_Day1
enriched in activated dendritic cells/monocytes (M64)	0.00268097	0.0366932	-0.701583	-1.96605	15	ANPEP|CXCL1|SIRPA|BASP1|IL13RA1|SOD2	BL_vs_Day1
RIG-1 like receptor signaling (M68)	0.00320513	0.0366932	0.819558	2.0347	9	CXCL10|IFIH1|ISG15|DHX58|IRF7|DDX58	BL_vs_Day1
enriched in B cells (VI) (M69)	0.00261097	0.0366932	-0.700196	-2.06295	18	FCRL2|CD72|ADAM28|MS4A1|FCRL1|P2RX5|TSPAN13|CD79B|CD79A|PCDH9|CD200|CR2	BL_vs_Day1
antiviral IFN signature (M75)	0.0033557	0.0371365	0.583093	1.88119	21	CXCL10|ELANE|DDX60|IFIH1|DHX58|PML|OAS1|IRF7|DDX58|OAS3|IFIT1|RSAD2|HERC5|SERPING1	BL_vs_Day1
viral sensing & immunity; IRF2 targets network (I) (M111.0)	0.00315457	0.0366932	0.732864	2.17877	16	AIF1|BST2|KYNU|PSMB8|IFI35|USP18|ZBP1|TNFSF13B|TAP1|RIPK2	BL_vs_Day1
viral sensing & immunity; IRF2 targets network (II) (M111.1)	0.00315457	0.0366932	0.823563	2.16155	11	CXCL10|BST2|PSMB8|USP18|ZBP1|TNFSF13B|DDX58|PSMB10|CASP1|TAP1|IFIT2	BL_vs_Day1
enriched in monocytes (IV) (M118.0)	0.00230947	0.0366932	-0.536961	-1.9877	44	STEAP4|ACSL1|VNN1|F5|HAL|MGAM|PTGS2|BCL6|TLR1|DOCK5|FGD4|IL1R2|PADI4|DYSF|DOK3	BL_vs_Day1
type I interferon response (M127)	0.0031348	0.0366932	0.778704	2.11631	12	IFITM1|DDX60|IFIH1|USP18|IRF7|TAP1|IFIT1|RSAD2|HERC5|STAT1|PARP9|PLSCR1	BL_vs_Day1
recruitment of neutrophils (M132)	0.00262467	0.0366932	-0.808523	-2.02554	10	PROK2|F2RL1|FPR2|CXCR1|C5AR1|PTAFR|FPR1	BL_vs_Day1
intracellular transport (M147)	0.00261097	0.0366932	-0.611631	-1.78367	17	ZFYVE16|VPS4B|G3BP2|CEP120|PIK3C2A|SIRT1|RAD21|NUP107	BL_vs_Day1
plasma cells & B cells, immunoglobulins (M156.0)	0.00501253	0.0489459	-0.574642	-1.79331	22	IGHD|FCRL2|ADAM28|IGLL5|BLK|FCRL1|P2RX5|VPREB3|SPIB|GNG7|PCDH9|OSBPL10	BL_vs_Day1
enriched in neutrophils (II) (M163)	0.00271739	0.0366932	-0.695755	-1.87311	13	BTNL8|SLC40A1|NPL|ARAP3|FRAT2|BEST1|IMPA2|DENND3	BL_vs_Day1
respiratory electron transport chain (mitochondrion) (M216)	0.00320513	0.0366932	0.782616	1.94299	9	NDUFB10|NDUFS6|UQCR10|COX7C|COX7B|COX6C|NDUFB7|COX6A1|UQCRB	BL_vs_Day1
respiratory electron transport chain (mitochondrion) (M219)	0.0031348	0.0366932	0.734146	2.22755	17	CYC1|COX5A|UQCR10|COX7C|UQCRH|COX7B|COX8A|COX6C|COX5B|UQCRQ|COX6B1|UQCRFS1|UQCRC1|COX6A1|UQCRB	BL_vs_Day1
transcription elongation, RNA polymerase II (M234)	0.00315457	0.0366932	0.765818	2.00999	11	NDUFB10|POLR2I|POLR2L|UQCR10|NDUFA3|NDUFB11|UQCRQ|POLR2E|MEA1|POLR2J|AURKAIP1	BL_vs_Day1
B cell surface signature (S2)	0.00461894	0.0484813	-0.454782	-1.72464	49	CNTNAP3|SEMA4B|FCRL2|CD72|CD180|FCRL5|EGF|ADAM28|MS4A1|FCRL1|P2RX5|TSPAN13|CD79B|LY9|FCRL3|CD79A|PCDH9|CD200|HRH4|CR2	BL_vs_Day1
Monocyte surface signature (S4)	0.00222222	0.0366932	-0.510222	-2.10189	79	STEAP4|VNN2|CYBRD1|FCAR|PECAM1|TLR2|FPR2|SLC40A1|MGAM|TMEM71|TLR1|CD302|IL1R2|GLIPR1|FCER1A|TREM1|SIGLEC9|C5AR1|TLR4|TMEM154|SLC11A1|IL6R|DYSF|MCTP1|PTPRE|CSF3R|TLR5|FCGR2A|PTAFR|APCDD1|ITGAM|ANO10|SIRPB1|FPR1	BL_vs_Day1
regulation of signal transduction (M3)	0.00298507	0.0449134	-0.467871	-1.77456	37	FOXO1|FGD4|SULF2|TRAT1|CSF1R|C5AR1|ENG|CDK14|SYK|RGL1|ADAP2|S100A12|WLS|GAB1|JUP	BL_vs_Day7
cell cycle and transcription (M4.0)	0.00245098	0.0449134	0.365033	1.85209	225	UBE2C|AURKB|CDT1|PLK1|TK1|RAD51|MYBL2|UBE2S|RRM2|CENPM|GINS2|EZH2|BIRC5|CDC20|PTTG1|CDCA7|KIF23|CCNB1|CEACAM8|E2F2|CCNF|MTMR11|SPAG5|DONSON|POLA2|KYNU|FES|PCNA|UHRF1|C1orf112|BUB1|PRIM1|SORT1|CCNB2|SLC31A2|CEBPD|FEN1|SECTM1|TNFAIP2|CLEC4E|CFD|PLAUR|MYOF|NCF1C|UBE2T|PAICS|ALDH2|MAFB|IL13RA1|FCGRT|GMNN|CST3|CD33|POC1A|RXRA|ZWINT|TYROBP|NCF1|TYMP|RFC4|IFI30	BL_vs_Day7
cell cycle (I) (M4.1)	0.0026455	0.0449134	0.560664	2.38939	74	UBE2C|AURKB|CDT1|PLK1|RAD51|MYBL2|UBE2S|RRM2|CENPM|GINS2|BIRC5|CDC20|PTTG1|KIF23|CCNB1|E2F2|CCNF|SPAG5|POLA2|NCAPD3|PCNA|UHRF1|RANBP1|BUB1|PRIM1|CCNB2|FEN1	BL_vs_Day7
PLK1 signaling events (M4.2)	0.0026178	0.0449134	0.747579	2.13244	14	PLK1|MYBL2|GINS2|CDC20|KIF23|BUB1	BL_vs_Day7
cell cycle (II) (M4.10)	0.00283286	0.0449134	0.776043	1.83258	8	RRM2|GINS2|CCNB1|CCNB2	BL_vs_Day7
E2F1 targets (Q4) (M10.1)	0.0026178	0.0449134	0.757934	2.16198	14	RAD51|PKMYT1|POLA2|PCNA|RANBP1|PRIM1	BL_vs_Day7
Ran mediated mitosis (M15)	0.00283286	0.0449134	0.812997	1.91985	8	AURKB|PLK1|UBE2S|RANBP1|KPNA2	BL_vs_Day7
immune activation - generic cluster (M37.0)	0.00324675	0.0449134	-0.269451	-1.42143	254	DACH1|SGK1|IL18RAP|SLCO4C1|F5|ANPEP|CACNA2D3|CD177|PROK2|CLC|CR1|CSE1L|MCM3|FOLR3|FOXO1|PCBP3|FGD4|SULF2|ARG1|TRAT1|PAX5|STEAP4|LIN7A|CCR9|DBF4|VNN1|BASP1|PPIL4|SLC24A4|MANSC1|BANK1|QPCT|ENG|MMP9|VNN2|MYO7B|CXCL1|ACSL1|CD72|CKAP2|MGAM|MEF2C|AQP9|RBP7|CORO2A|HMGB2|RGL4|CDK14|CA4|SH2D1A|BARD1|VANGL1|CHIT1|S100P|ITGAM|MGST1|FBP1|RUNX2|EMILIN2|ARAP3|RHOU|S100A8|PRAM1|RGL1|CD22|CENPL|TCL1A|PYGL|DOK3|S…	BL_vs_Day7
enriched in neutrophils (I) (M37.1)	0.00297619	0.0449134	-0.519389	-2.0519	44	MME|PROK2|STEAP4|LIN7A|NLRP12|C5AR1|BASP1|MANSC1|VNN2|MGAM|ALPL|RGL4|VNN3|S100P|TNFRSF10C	BL_vs_Day7
cell division in stimulated CD4+ T cells (M46)	0.0026178	0.0449134	0.700853	1.99916	14	CDT1|RAD51|RRM2|CDCA7|DHCR24|UHRF1|GNB4|ZWINT	BL_vs_Day7
enriched in B cells (I) (M47.0)	0.00303951	0.0449134	-0.582746	-2.27106	41	RALGPS2|IGHD|TSPAN13|PLEKHG1|PAX5|CXCR5|KLHL14|TCF4|MS4A1|AFF3|BANK1|ABCB4|IGHM|CD72|FCRL5|PNOC|CD24|FCRLA|CD22|CD79B|TCL1A|EBF1|BLK|FCER2|BTLA|SPIB	BL_vs_Day7
enriched in B cells (II) (M47.1)	0.00297619	0.0449134	-0.584841	-2.1732	34	CD180|RALGPS2|KLF8|PLEKHG1|PAX5|CXCR5|KLHL14|TCF4|MS4A1|BANK1|IGHM|FCRL5|PNOC|CDK14|CD24|FCRLA|FCGR2B|CD79B|TCL1A|EBF1	BL_vs_Day7
enriched in B cells (III) (M47.2)	0.00310559	0.0449134	-0.609717	-1.98499	22	CD180|IGHD|TBC1D9|FCRL5|PNOC|MEF2C|CDK14|CD24|FCRLA|FCGR2B	BL_vs_Day7
transcription regulation in cell development (M49)	0.0027248	0.0449134	0.538759	2.00237	37	KLF1|EPB42|ACHE|SPTB|CDC20|CCNB1|GATA1|TMOD1|FES|TAL1|ANK1|ARHGEF12|RXRA|TYROBP|FHL2|KLF4	BL_vs_Day7
CD1 and other DC receptors (M50)	0.00286533	0.0449134	-0.802239	-1.94681	8	CD1C|ANPEP|CSF1R|CSF2RA	BL_vs_Day7
heme biosynthesis (I) (M171)	0.00280112	0.0449134	0.896239	2.32507	11	ALAS2|FECH|HMBS|PLEK2|AHSP|GATA1|E2F2|HEMGN|TMOD1	BL_vs_Day7
erythrocyte differentiation (M173)	0.0028169	0.0449134	0.889731	2.20391	9	BPGM|TRIM10|KLF1|EPB42|HMBS|GATA1|LYL1	BL_vs_Day7
heme biosynthesis (II) (M222)	0.00278552	0.0449134	0.763622	1.93947	10	TRIM10|YPEL4|KLF1|HMBS|BLVRB|PPOX|UROD|CPOX	BL_vs_Day7
transcription elongation, RNA polymerase II (M234)	0.00280112	0.0449134	0.727776	1.88804	11	POLR2E|AURKAIP1|NDUFB10|POLR2J|NDUFA3|NDUFB11|UQCR10|POLR2L|POLR2I	BL_vs_Day7
cell cycle and transcription (M4.0)	0.00278552	0.0403647	0.398047	2.05535	225	UBE2C|AURKB|CDCA8|PTTG1|SECTM1|UBE2S|CEACAM8|S100A11|PLAUR|PILRA|CEBPA|AURKA|FCER1G|BIRC5|LILRA1|SIRPB2|CDC20|NCF1C|LRRC25|CST3|NDC80|ALDH2|GINS2|LILRA2|LILRB1|TYROBP|CDCA7|MTMR11|HSPA6|FXYD6|NCF1|E2F2|ASGR1|CTSH|RAB31|MYBL2|CD33|RRM2|APOBEC3A|RXRA|DONSON|CD1D|IL1RN|IGSF6|SPI1|TNFSF13|KYNU|LST1|SLC7A7|FCGR1A|FES|PRIM1|CSTA|BRCA1|CFD|MAFB|PLK1|RAD51|GINS4|SLC31A2|TYMP|CD300LF|PGLYRP1|FCGR1B|NOD2|C…	BL_vs_Day21
myeloid cell enriched receptors and transporters (M4.3)	0.00271739	0.0403647	0.576736	2.02575	27	SECTM1|MS4A14|LILRA1|LRRC25|GPBAR1|MTMR11|ASGR1|CD1D|IGSF6|MARCO|SLC7A7	BL_vs_Day21
mitotic cell division (M6)	0.00540541	0.0439939	0.67139	1.87855	13	AURKB|CDCA8|BIRC5|CDC20|NDC80|CENPO|PLK1|CENPM	BL_vs_Day21
T cell activation (I) (M7.1)	0.00558659	0.0439939	-0.421172	-1.71025	50	CD28|ITPR3|CAMK4|IL7R|THEMIS|DPP4|RASGRP1|IL21R|CRTAM|PRKCQ|IKZF1|NLRC3|PRKCH|ITK|CD5|TIGIT|RHOH|LEF1|MS4A1|EOMES	BL_vs_Day21
enriched in NK cells (I) (M7.2)	0.00557103	0.0439939	-0.441088	-1.74367	45	KLRF1|HOPX|KLRB1|GIMAP7|TGFBR3|FGFBP2|IL18RAP|ARL4C|PRKCQ|NLRC3|GZMA|PRKCH|ITK|S1PR5|KLRC1|KLRD1|STAT4|MYBL1|EOMES|CD96|IL2RB	BL_vs_Day21
T cell activation (III) (M7.4)	0.00301205	0.0403647	-0.657549	-1.84398	13	ZMYND11|CAMK4|THEMIS|RASGRP1|ETS1|PRKCQ|NELL2|LEF1|CD96	BL_vs_Day21
enriched in monocytes (II) (M11.0)	0.0027027	0.0403647	0.411725	2.07371	177	SECTM1|ALDH1A1|BLVRB|KCNE3|CDA|NFE2|S100A11|PLAUR|PILRA|GAS2L1|CEBPA|FCER1G|LILRA1|NRGN|NCF1C|CST3|ALDH2|LILRA2|RAB32|LILRB1|TYROBP|MTMR11|HSPA6|FXYD6|NCF1|ASGR1|BST1|LAT2|CTSH|RAB31|CD33|LILRA5|RXRA|CD1D|IGSF6|SPI1|TNFSF13|KYNU|LST1|SLC7A7|FCGR1A|FES|IFNGR2|CSTA|CFD|MAFB|SLC31A2|TYMP|FCGR1B|NOD2|LY86|LILRB2|SERPINA1|CFP|CPVL|LMO2|FCGRT|PLXDC2|KLF4|NCF2|FCN1|FPR1|FCAR|SIRPB1|MS4A6A|HCK|TIMP2|LILR…	BL_vs_Day21
T cell differentiation via ITK and PKC (M18)	0.00561798	0.0439939	-0.715787	-1.93942	11	SPOCK2|BCL2|ETS1|ITM2A|PRKCQ|PRKCH|ITK|SH2D1A|ABLIM1	BL_vs_Day21
cell movement, Adhesion & Platelet activation (M30)	0.00536193	0.0439939	0.676444	1.98857	15	TNS1|ESAM|ALOX12|MPP1|SELP|GP6|CALD1	BL_vs_Day21
integrin mediated leukocyte migration (M39)	0.00558659	0.0439939	-0.753554	-1.89419	9	ITGA4|ITGAL|ITGB2|PIK3CD|PLCG1|ITK	BL_vs_Day21
enriched in B cells (I) (M47.0)	0.00290698	0.0403647	-0.519557	-2.00373	41	IGHD|PAX5|FCRL2|TSPAN13|IGHM|AFF3|CR2|TCF4|RALGPS2|CD200|PLEKHG1|EBF1|BANK1|FCER2|ADAM28|PNOC|MS4A1|KLHL14|CD24|BTLA|CD19|TCL1A	BL_vs_Day21
enriched in B cells (II) (M47.1)	0.002849	0.0403647	-0.50104	-1.84063	34	PAX5|IGHM|KLF8|CR2|TCF4|RALGPS2|PLEKHG1|CDK14|CD180|EBF1|BANK1|TPD52|PNOC|MS4A1|KLHL14|CD24|CD19|TCL1A|IGHA1	BL_vs_Day21
enriched in B cells (III) (M47.2)	0.00591716	0.0446477	-0.549166	-1.77575	22	CD69|TBC1D9|IGHD|MEF2C|CDK14|CD180|TPD52|PNOC|FCRL3|CD24|BTK|IGHA1	BL_vs_Day21
transcription regulation in cell development (M49)	0.00289017	0.0403647	0.582304	2.18706	37	KLF1|EPB42|ACHE|GATA1|CEBPA|TAL1|FHL2|CDC20|SPTB|LILRB1|TYROBP|TMOD1|ARHGEF12|RXRA|MYH10|LST1|FES|ANK1|BRCA1	BL_vs_Day21
cell adhesion (M51)	0.0027248	0.0403647	0.615203	1.91473	18	ESAM|GP9|ALOX12|ITGB5|ARHGAP6|SELP|GP1BA|ITGA2B|PARVB|SLAMF7|IL1B|THBS1	BL_vs_Day21
phosphatidylinositol signaling system (M101)	0.00288184	0.0403647	-0.702376	-1.95095	12	IMPA1|PIKFYVE|SP3|SLC35A1|CLK1|PIK3C2A|PPP1R12A|PIK3C3|PHTF2	BL_vs_Day21
viral sensing & immunity; IRF2 targets network (I) (M111.0)	0.00549451	0.0439939	0.667478	1.98818	16	PSMB8|IFI35|BST2|RIPK2|TAP1|KYNU|FES|TNFSF13B|CXCL16|LY86|ZBP1|THBS1|AIF1	BL_vs_Day21
golgi membrane (I) (M113)	0.00558659	0.0439939	-0.728631	-1.83154	9	CSGALNACT1|WLS|STEAP4|B3GNT5|PDGFC|SGMS2|TLR8	BL_vs_Day21
enriched in membrane proteins (M124)	0.00549451	0.0439939	0.657384	1.95811	16	TGM2|AQP1|ALAS2|ABCG2|SLC4A1|SNCA|HP|KCNH2	BL_vs_Day21
inositol phosphate metabolism (M129)	0.00288184	0.0403647	-0.729614	-2.02661	12	IMPA1|PIKFYVE|MED23|PIK3C2A|PLEKHF2|SRP9|PANK3|PIK3C3|KIAA1109	BL_vs_Day21
enriched for ubiquitination (M138)	0.00558659	0.0439939	-0.771953	-1.94044	9	USP1|UBE2Q2|ZBTB41|MBNL2|UBR1|PIK3C2A|SRP9|PHTF2	BL_vs_Day21
intracellular transport (M147)	0.00298507	0.0403647	-0.758433	-2.30518	17	CLINT1|CEP120|SEC63|NUP107|PIKFYVE|G3BP2|VPS4B|PIK3C2A|ZFAND6|SIRT1|RAD21|PPP1R12A|SRP9|NUP133|EXOC1|ZFYVE16	BL_vs_Day21
mitosis (TF motif CCAATNNSNNNGCG) (M169)	0.00301205	0.0403647	-0.699149	-1.96064	13	CASP8AP2|TMPO|PMS1|SMC1A|XPO1|UPF3B|ACTR6|ARMC1	BL_vs_Day21
heme biosynthesis (I) (M171)	0.00289017	0.0403647	0.860936	2.25258	11	ALAS2|PLEK2|GATA1|AHSP|FECH|HMBS|TMOD1|E2F2|HEMGN	BL_vs_Day21
erythrocyte differentiation (M173)	0.00290698	0.0403647	0.885394	2.20736	9	KLF1|EPB42|TRIM10|LYL1|GATA1|FHL2|BPGM|HMBS|MYH10	BL_vs_Day21
enriched for TF motif PAX3 (M179)	0.0027933	0.0403647	-0.877147	-2.20486	9	CASP8AP2|USP1|BMI1|RANBP6|PMS1|TNFAIP8	BL_vs_Day21
platelet activation - actin binding (M196)	0.00540541	0.0439939	0.713781	1.99716	13	MPL|ITGB5|PDE5A|ABLIM3|MFAP3L|ARHGAP6|ITGA2B|ASAP2|THBS1	BL_vs_Day21
regulation of transcription, transcription factors (M213)	0.00295858	0.0403647	-0.667507	-2.01012	16	CREBZF|STAG2|CLK1|MED23|BTAF1|PPP1R12A|ARID4B|CCNT2|ZDHHC17|ZNF700|KIAA1109|CLK4|FMR1	BL_vs_Day21
respiratory electron transport chain (mitochondrion) (M219)	0.00544959	0.0439939	0.58933	1.78965	17	COX8A|CYC1|COX5B|COX5A|UQCRC1|COX6B1|COX6A1	BL_vs_Day21
heme biosynthesis (II) (M222)	0.00569801	0.0439939	0.736405	1.89044	10	KLF1|TRIM10|BLVRB|YPEL4|HMBS|UROD|RHCE|PPOX	BL_vs_Day21
cell cycle and transcription (M4.0)	0.0026738	0.0214706	0.514381	2.75886	225	LILRA6|CSTA|UBE2S|NCF1|PLAUR|CLEC4E|PILRA|S100A9|NCF1C|FES|PLBD1|SORT1|NDC80|KYNU|NCF2|HSPA6|SECTM1|IRAK3|TYMP|LMO2|RBM47|RAB31|KIF23|TNFAIP2|DMXL2|IGSF6|FGL2|SLC31A2|S100A12|CYBB|TYROBP|AIF1|FCN1|MS4A6A|FPR1|FCGR1A|CSF3R|CD33|PRKCD|KCTD12|S100A11|CPPED1|TLR8|FCGR1B|ASGR2|HCK|TFEC|WDFY3|TLR2|LILRA2|LILRB2|FCGR2A|UBE2C|IL1RN|SPI1|SERPINA1|NOD2|LILRB3|MYOF|SIRPB2|CLEC7A|TLR4|CLEC4A|MTMR11|MNDA|CHST…	BL_vs_Day22
myeloid cell enriched receptors and transporters (M4.3)	0.00268097	0.0214706	0.650911	2.3548	27	SECTM1|IGSF6|SLC8A1|KCTD12|TLR8|MYOF|CLEC4A|MTMR11|CHST15|CD1D|MARCO|LILRA1|GPBAR1|SLC7A7|MS4A14|LRRC25|CD86|CCR1|TLR5|ASGR1|SLC15A3|SLC2A6	BL_vs_Day22
cell junction (GO) (M4.13)	0.00287356	0.0214706	0.7456	2.00038	11	FES|PAK1|PRKCD|KCTD12|LCP1|HCK|IFI30|EPB41L3|CTNNA1|TNS3	BL_vs_Day22
enriched in monocytes (I) (M4.15)	0.00561798	0.0266742	0.730203	1.92335	10	FES|SLC31A2|HCK|EPB41L3|TNFSF13|RTN1|LGALS3	BL_vs_Day22
T cell activation and signaling (M5.1)	0.0058651	0.0266742	-0.538787	-1.75839	20	ZAP70|CD247|CD3G|PRKACB|LCK|CD3E|CD2|ITK|CD3D|CD4|CCR7	BL_vs_Day22
enriched in T cells (I) (M7.0)	0.00285714	0.0214706	-0.776497	-3.35379	56	EOMES|RORA|CD96|PRKCQ|PRF1|IL7R|NLRC3|ZAP70|CD247|GNLY|GZMH|CD3G|NELL2|PRKCH|NKG7|CD6|SIRPG|LCK|CD3E|RASGRP1|GZMM|SAMD3|CD2|ETS1|IL32|ITK|GATA3|GZMB|XCL1|CD28|SIT1|TIGIT|TRBC1|KLRB1|CD7|CCL5|GZMK|TRAC|GPR171|ITM2A|CD3D|SH2D1A|CD27|GZMA|BCL11B|LAT|XCL2|MAL	BL_vs_Day22
T cell activation (I) (M7.1)	0.00285714	0.0214706	-0.72315	-3.06423	50	EOMES|RORA|CD8A|PRKCQ|IL7R|CD8B|NLRC3|ZAP70|CD247|CRTAM|CAMK4|CD3G|PRKCH|SIRPG|LCK|CD3E|RASGRP1|CD2|TCF7|ITPR3|ITK|GATA3|THEMIS|CD28|SIT1|TIGIT|TRBC1|IL21R|CD7|CD5|CCL5|TRAC|CD3D|TXK|CD27|BCL11B|KLRK1|CCR7	BL_vs_Day22
enriched in NK cells (I) (M7.2)	0.002849	0.0214706	-0.796697	-3.2739	45	KLRD1|TGFBR3|EOMES|RORA|FGFBP2|TBX21|S1PR5|CD96|IL2RB|PRKCQ|PRF1|HOPX|PTGDR|NLRC3|ARL4C|ZAP70|CD247|GNLY|GZMH|MYBL1|PRKCH|NKG7|SH2D2A|CTSW|FASLG|STAT4|CLIC3|GZMM|SAMD3|ITK|GZMB|XCL1|KLRB1|CCL5|PLEKHF1|CST7|KLRF1	BL_vs_Day22
T cell activation (II) (M7.3)	0.00303951	0.0214706	-0.646016	-2.27361	27	NLRC3|ZAP70|CD247|CRTAM|CD3G|NKG7|STAT4|SIRPG|LCK|CD3E|ITK|TIGIT|CCL5|CXCR3|PTPN7|GPR171|CD3D|GZMA	BL_vs_Day22
T cell activation (III) (M7.4)	0.00299401	0.0214706	-0.833638	-2.42183	13	RORA|CD96|PRKCQ|CAMK4|ATP8B2|NELL2|KLF12|LCK|RASGRP1|ETS1|THEMIS	BL_vs_Day22
enriched in monocytes (II) (M11.0)	0.00260417	0.0214706	0.657709	3.43822	177	ALDH1A1|LILRA6|CSTA|NCF1|PLAUR|CLEC4E|PILRA|S100A9|NCF1C|FES|BST1|PLBD1|PLXDC2|SORT1|LAT2|KYNU|NCF2|HSPA6|SECTM1|IRAK3|TYMP|LMO2|RBM47|RAB31|TNFAIP2|IFNGR2|DMXL2|IGSF6|FGL2|SLC31A2|S100A12|CYBB|MEGF9|TYROBP|AIF1|FCN1|MS4A6A|FPR1|KCNE3|QPCT|FCGR1A|CSF3R|CD33|RAB32|PRKCD|KCTD12|S100A8|S100A11|CPPED1|TLR8|FCGR1B|ASGR2|HCK|TFEC|TLR2|LILRA2|LILRB2|FCGR2A|PADI2|LYN|SPI1|SERPINA1|NOD2|LILRB3|MYOF|CLEC7A…	BL_vs_Day22
blood coagulation (M11.1)	0.00275482	0.0214706	0.611763	2.04332	21	PLAUR|GNB4|SLC16A3|LYN|SERPINA1|SERPINB2|TREM1|CD36|SIRPA|ITGAM|SLC7A7|FCER1G|F13A1|F5|SYK|CFD|PSAP	BL_vs_Day22
formyl peptide receptor mediated neutrophil response (M11.2)	0.00280899	0.0214706	0.805573	2.12187	10	PILRA|NCF1C|PAK1|NCF2|SECTM1|IGSF6|FPR1|FCGR2A	BL_vs_Day22
innate activation by cytosolic DNA sensing (M13)	0.011236	0.0446477	0.67537	1.77892	10	NFKBIA|PYCARD|CXCL10|AIM2|IRF7|ZBP1|DDX58|IL1B	BL_vs_Day22
T cell differentiation (M14)	0.00289017	0.0214706	-0.788558	-2.2531	12	SPOCK2|RASGRP1|TCF7|ITK|CD28|NOG|TXK|SH2D1A|BCL11B|LRRN3|MAL	BL_vs_Day22
TLR and inflammatory signaling (M16)	0.00280899	0.0214706	0.737938	2.92224	43	LILRA6|PILRA|FES|BST1|KCNJ15|DYSF|HSPA6|IRAK3|LY96|TYROBP|NCF4|FPR1|CSF3R|TLR8|FCGR1B|WDFY3|TLR2|LILRB2|LILRB3|TLR4|FPR2|FCAR|P2RY13|KCNJ2|FGR|ALOX5|LILRB1|FCGR2C|MYD88|TLR1|TLR7|SIGLEC9|MGAM|NPL|CXCR2|NFE2|AQP9	BL_vs_Day22
T cell differentiation via ITK and PKC (M18)	0.00282486	0.0214706	-0.858398	-2.39175	11	PRKCQ|PRKCH|SPOCK2|FASLG|BCL2|SIRPG|ETS1|ITK|ABLIM1|ITM2A|SH2D1A	BL_vs_Day22
T cell differentiation (Th2) (M19)	0.00298507	0.0214706	-0.693294	-2.15272	16	CD3G|LCK|IL32|GATA3|CD28|SIT1|GZMK|GPR171|ITM2A|LAT|MAL	BL_vs_Day22
TLR8-BAFF network (M25)	0.00561798	0.0266742	0.745245	1.96297	10	BCL6|TLR8|ASGR2|TNFSF13B|TBXAS1|AP1S2|SLC40A1|IL1R2	BL_vs_Day22
cell cycle and growth arrest (M31)	0.00291545	0.0214706	0.759677	1.92901	9	GADD45B|JUNB|RARA|PPP1R15A|DUSP1|OSM|IL1B|TNFAIP3|THBS1	BL_vs_Day22
signaling in T cells (II) (M35.1)	0.00835655	0.0374915	-0.688048	-1.78599	9	IL2RB|PRF1|FASLG|GZMB|TNFRSF18|IL2RA	BL_vs_Day22
immune activation - generic cluster (M37.0)	0.00271003	0.0214706	0.434912	2.36325	254	G0S2|ALDH1A1|BMX|PRRG4|KLF5|SLC26A8|CLEC4D|BST1|PLXDC2|JAG1|LAT2|LRRK2|KCNJ15|MCTP1|DYSF|BCL6|ROPN1L|LY96|SLC22A15|SLC8A1|ST3GAL6|LPCAT2|CREB5|CEACAM1|BPI|CLEC5A|ENTPD1|DUSP6|MEGF9|LRRC4|NCF4|HAL|STX11|BRCA2|KCNE3|FCGR3B|QPCT|CIITA|GPR84|ANXA5|ANXA3|RAB32|VSIG10|PFKFB4|S100A8|SAMHD1|CSF2RB|GSN|PADI2|SIGLEC5|LYN|PSRC1|DOCK5|ACTN1|IL1R1|PRKAR2B|FPR2|CTSS|LYZ|FCAR|TNFAIP6|SIRPB1|VNN2|LTF|P2RY13|NLRC…	BL_vs_Day22
enriched in neutrophils (I) (M37.1)	0.00289855	0.0214706	0.683784	2.70917	44	G0S2|KCNJ15|MXD1|CREB5|LRRC4|NCF4|FPR1|FCGR3B|CSF3R|ST6GALNAC2|PFKFB4|REPS2|FCGR2A|FPR2|VNN2|SLC22A4|KRT23|GLT1D1|TREM1|PTAFR|CDA|FCGR3A|PYGL|FFAR2|CHI3L1|STEAP4|VNN3|DGAT2|LRG1|MGAM|NFE2|TNFRSF10C	BL_vs_Day22
cell division (M37.3)	0.0115607	0.0446477	-0.639876	-1.71394	10	RUVBL1|CKAP2|VRK1|BLM|NCAPD2	BL_vs_Day22
complement and other receptors in DCs (M40)	0.0058309	0.0266742	0.748777	1.90133	9	LY96|TYROBP|TLR8|C1QB|CD58|SIRPA|CD86	BL_vs_Day22
enriched in B cells (I) (M47.0)	0.00293255	0.0214706	-0.661348	-2.65449	41	IGHD|PAX5|TCL1A|CD72|CD79B|SPIB|BLK|IGHM|CXCR5|CD22|FCER2|CD79A|TCF4|BCL11A|FCRLA|EBF1|PNOC|AFF3|TSPAN13|CD19|P2RX5|VPREB3|KLHL14|CD24|MS4A1|PLEKHG1|PCDH9|RALGPS2|BTLA|FCRL2	BL_vs_Day22
enriched in B cells (II) (M47.1)	0.00287356	0.0214706	-0.577632	-2.20846	34	PAX5|TCL1A|CD79B|IGHM|CXCR5|CD180|CD79A|TCF4|BCL11A|CELSR1|FCRLA|EBF1|KLF8|PNOC|CD19|KLHL14|TPD52|CD24|MS4A1|PLEKHG1|RALGPS2|DENND5B|POU2AF1	BL_vs_Day22
enriched in B cells (III) (M47.2)	0.0118343	0.0446477	-0.502322	-1.68569	22	FCRL3|IGHD|TBC1D9|CD180|CELSR1|FCRLA|PNOC|VPREB3|TPD52|CD24	BL_vs_Day22
enriched in B cells (V) (M47.4)	0.00578035	0.0266742	-0.738817	-1.97896	10	FCRL3|LY9|CD180|CELSR1|TLR10	BL_vs_Day22
transcription regulation in cell development (M49)	0.00287356	0.0214706	0.494532	1.91536	37	FES|PAK1|FHL2|TYROBP|GSN|LYN|SOD2|KLF4|FBXO5|LILRB1|LST1|MYH10|TMOD1|SEMA4A|TIMP2|KLF1|CEBPA|EPB42|GATA1|CDC20|ACHE|TAL1|SPTB|ARHGEF12|BRCA1|CCNB1|ANK1	BL_vs_Day22
cell adhesion (M51)	0.00271739	0.0214706	0.602857	1.91746	18	ESAM|MMRN1|GP1BA|SLAMF7|SELP|GP9|ITGB5|ALOX12|ITGA2B|IL1B|ARHGAP6|THBS1|TPM1|ITGB3	BL_vs_Day22
inflammasome receptors and signaling (M53)	0.00561798	0.0266742	0.684406	1.9043	12	PAK1|NFKBIA|NOD2|TLR4|NLRC4|RIPK2|NLRP3|TNFAIP3	BL_vs_Day22
suppression of MAPK signaling (M56)	0.00280899	0.0214706	0.76701	2.13414	12	HSPA6|DUSP6|ARRB2|DUSP3|FOS|DUSP1|RASGRP4|IL1B|IL1R2	BL_vs_Day22
lymphocyte generic cluster (M60)	0.00898204	0.0387277	-0.606523	-1.76203	13	SH2D2A|CD2|ADARB1|CD28|DTX3|CD19|PRKCZ|DHCR24|BANK1	BL_vs_Day22
enriched in NK cells (II) (M61.0)	0.00301205	0.0214706	-0.824866	-2.43194	14	TGFBR3|S1PR5|CD96|IL2RB|CD247|NKG7|KIR3DL1|KIR2DL3|KLRB1|CD7|KIR2DL1|KLRF1|KLRK1	BL_vs_Day22
enriched in NK cells (KIR cluster) (M61.1)	0.0116618	0.0446477	-0.79363	-1.68312	5	KIR3DL1|KIR2DL3|KIR2DL1	BL_vs_Day22
enriched in NK cells (receptor activation) (M61.2)	0.00299401	0.0214706	-0.842185	-2.44666	13	KLRD1|CD96|PRKCQ|ZAP70|CD247|CD244|KIR3DL1|CARD11|KIR2DL3|ITK|KIR2DL1	BL_vs_Day22
T & B cell development, activation (M62.0)	0.0058651	0.0266742	-0.56666	-1.84936	20	ADCY9|TCL1A|CD3G|CD3E|FKBP14|CD7|EBF1|SH2D1A|MAL|VPREB3|CD9	BL_vs_Day22
enriched in activated dendritic cells/monocytes (M64)	0.00266667	0.0214706	0.705114	2.12619	15	G0S2|DRAM1|TNFAIP2|SLC31A2|IL1RN|NINJ1|SOD2|SIRPA|IL1B|IL13RA1|MARCKS	BL_vs_Day22
IL2, IL7, TCR network (M65)	0.0115607	0.0446477	-0.645142	-1.72805	10	IL7R|BCL2|LCK|ITK|TRBC1|TRAC|CCR7	BL_vs_Day22
activated dendritic cells (M67)	0.011236	0.0446477	0.676822	1.78274	10	CD38|SERPING1|IRF7|PLSCR1|DDX58|IFIH1|DDX60	BL_vs_Day22
RIG-1 like receptor signaling (M68)	0.0058309	0.0266742	0.744534	1.89056	9	NFKBIA|CXCL10|TRIM25|IRF7|TNF|DDX58|IFIH1|ISG15|DHX58	BL_vs_Day22
enriched in B cells (VI) (M69)	0.00299401	0.0214706	-0.637052	-2.0277	18	CD72|CD79B|CXCR5|CD22|CD79A|TSPAN13|CD19|P2RX5|MS4A1|PCDH9|BTLA|FCRL2|ABCB4	BL_vs_Day22
enriched in monocytes (III) (M73)	0.00287356	0.0214706	0.734334	1.97015	11	PLXDC2|BCL6|CEBPB|DUSP6|TFEC|FOS|IER3|CCR1|TIMP2|RIN2	BL_vs_Day22
antiviral IFN signature (M75)	0.00275482	0.0214706	0.59483	1.98677	21	BCL3|CXCL10|ANXA3|RARA|SERPING1|PML|IRF7|C1QB|DDX58|IFIH1|IL1B|DDX60|HERC5|OAS1|DHX58|OAS3|RSAD2	BL_vs_Day22
collagen, TGFB family et al (M77)	0.00898204	0.0387277	-0.560964	-1.78552	18	COL6A2|IGFBP3|ENG|GATA3|PDGFRB|TCF4|JUP|CAMK1|BCL11B|SEMA6A|CD24|CD9	BL_vs_Day22
enriched in myeloid cells and monocytes (M81)	0.00284091	0.0214706	0.660838	2.52033	33	BCL6|SLC8A1|CLEC5A|MMRN1|ACTN1|TLR4|CCR2|HHEX|SELP|SPARC|NLRP3|MYH10|CLU|PDGFA|CHI3L1|ITGA2B|TLR7|SNCA|FCER1G|PTGS1|MARCKS|F5|THBS1|PCSK6|ITGB3|LIN7A	BL_vs_Day22
transmembrane transport (I) (M87)	0.00277008	0.0214706	0.59817	1.96374	20	VDR|SLC31A2|ATP1B2|TLR2|TLR4|SLC22A4|NLRP3|CD36|SLC14A1|SLC11A1|SLC7A7|AQP9|AQP1|SLC4A1|HK3|SLC15A3	BL_vs_Day22
enriched in antigen presentation (II) (M95.0)	0.00544959	0.0266742	0.66031	2.02106	16	PLEK|EVI2B|FGL2|CD53|AIF1|SELL|HCLS1|PTPRC|ITGAM|SLA|IRF8	BL_vs_Day22
enriched in antigen presentation (III) (M95.1)	0.002849	0.0214706	0.868006	2.12985	8	PLEK|ICAM1|EVI2B|CD53|AIF1|LAPTM5|PTPRC	BL_vs_Day22
enriched for SMAD2/3 signaling (M97)	0.00571429	0.0266742	-0.755402	-1.75954	7	TCL1A|BIVM|GATA3	BL_vs_Day22
viral sensing & immunity; IRF2 targets network (I) (M111.0)	0.0027248	0.0214706	0.78743	2.41015	16	PSMB8|FES|CXCL16|KYNU|AIF1|BST2|TAP1|IFI35|CTSS|TNFSF13B|RIPK2|ZBP1	BL_vs_Day22
viral sensing & immunity; IRF2 targets network (II) (M111.1)	0.00287356	0.0214706	0.805509	2.16111	11	PSMB8|PSMB10|CASP1|CXCL10|BST2|TAP1|TNFSF13B|ZBP1|DDX58	BL_vs_Day22
enriched in monocytes (IV) (M118.0)	0.00289855	0.0214706	0.644282	2.55267	44	SMARCD3|PAK1|LRRK2|DYSF|BCL6|LY96|ST3GAL6|DUSP6|DPYD|HAL|SAMHD1|MYO1F|DOCK5|CTSS|LYZ|LTBR|TNFSF13B|HHEX|ACSL1|MPP1|PTGS2|TLR1|STEAP4|IL1R2|PGD|C1orf162|MGAM|CXCR2|F5|RHOU|LGALS3|ARHGEF10L|TNFRSF1B|DOK3	BL_vs_Day22
enriched in monocytes (surface) (M118.1)	0.00543478	0.0266742	0.671716	1.91522	13	MCTP1|NFAM1|SLC16A3|S1PR3|LTBR|TNFSF13B|STEAP4|IL1R2|C1orf162|TNFRSF1B	BL_vs_Day22
type I interferon response (M127)	0.00561798	0.0266742	0.714517	1.98808	12	TAP1|STAT1|IFITM1|IRF7|PLSCR1|PARP9|IFIH1|DDX60|HERC5	BL_vs_Day22
enriched in G-protein coupled receptors (M130)	0.00289017	0.0214706	-0.785728	-2.10461	10	S1PR5|PTGDR|ITPR3|XCL1|CCL5|ADRB2|PTGER2	BL_vs_Day22
recruitment of neutrophils (M132)	0.011236	0.0446477	0.669049	1.76227	10	FPR1|GNG10|FPR2|F2RL1|PTAFR|FFAR2|C5AR1|CXCR1|CCR3	BL_vs_Day22
innate antiviral response (M150)	0.011236	0.0446477	0.634978	1.76677	12	TAP1|SP100|IRF7|PLSCR1|APOBEC3A|OASL|EIF2AK2|OAS1|OAS3|RSAD2|IFIT1|RXRA	BL_vs_Day22
plasma cells & B cells, immunoglobulins (M156.0)	0.0118343	0.0446477	-0.48894	-1.64078	22	IGHD|SPIB|BLK|CD22|ITM2C|P2RX5|VPREB3|IGLL5|PCDH9|OSBPL10|FCRL2|ABCB4	BL_vs_Day22
enriched in NK cells (III) (M157)	0.00289017	0.0214706	-0.844662	-2.4134	12	TRGC2|C1orf21|PTPN4|MATK|CX3CR1|PPP1R16B|RASGRP1|TIGIT|CD7	BL_vs_Day22
enriched in neutrophils (II) (M163)	0.00543478	0.0266742	0.670391	1.91144	13	HSPA6|TYROBP|MBOAT7|DENND3|BEST1|SLC40A1|TSPAN2|NPL|FRAT2|CFD	BL_vs_Day22
enriched in activated dendritic cells (II) (M165)	0.00277008	0.0214706	0.638946	2.30977	28	PRRG4|HLX|RBM47|DOCK4|IFNGR2|ST3GAL6|IFI27|CSF2RB|IL18|PRKAR2B|SERPING1|TNFAIP6|DSE|PARP9|MX2|IFIH1|CSF2RA|HERC5|IFIT3|IFIT2|BCL2A1|LAMP3	BL_vs_Day22
enriched in dendritic cells (M168)	0.00533333	0.0266742	0.608743	1.8356	15	JAG1|CA2|CLEC5A|IL1R1|CTSB|B3GNT5|PGD|ADAM9|DAB2|CAPG	BL_vs_Day22
mitosis (TF motif CCAATNNSNNNGCG) (M169)	0.00898204	0.0387277	-0.605124	-1.75797	13	CASP8AP2|UPF3B|PMS1|TMPO|NIF3L1|ACTL6A|NOC3L|SMC1A	BL_vs_Day22
enriched for TF motif PAX3 (M179)	0.00557103	0.0266742	-0.727268	-1.88779	9	BMI1|CASP8AP2|NUP54|PURA|TRMT11|PMS1|TNFAIP8	BL_vs_Day22
platelet activation - actin binding (M196)	0.00543478	0.0266742	0.682534	1.94607	13	ABLIM3|MFAP3L|MPL|ITGB5|ITGA2B|ASAP2|ARHGAP6|THBS1|TPM1|ITGB3|PDE5A|TPM4	BL_vs_Day22
lysosome (M209)	0.00568182	0.0266742	0.790043	1.85148	7	GM2A|SORT1|CTSZ|GNS|CTSB	BL_vs_Day22
small GTPase mediated signal transduction (M215)	0.00533333	0.0266742	0.617142	1.86092	15	ARHGAP25|TAGAP|ARHGAP9|RHOG|FGD3|RAC2|VAV1|GMIP	BL_vs_Day22
respiratory electron transport chain (mitochondrion) (M219)	0.00543478	0.0266742	0.617389	1.9194	17	COX5B|COX8A|COX7B|COX6A1|COX6B1|UQCRC2|CYC1|UQCRQ|UQCRFS1|COX6C|UQCRC1|UQCR10|COX5A|COX7A2L|UQCRH	BL_vs_Day22
enriched in T cells (II) (M223)	0.00289017	0.0214706	-0.774127	-2.21186	12	TRGC2|FGFBP2|SLC38A1|HOPX|LBH|CLEC2D|PLEKHF1|DENND2D|TC2N|LRRN3	BL_vs_Day22
cell cycle, mitotic phase (M230)	0.00578035	0.0266742	-0.711693	-1.90631	10	JMY|CD28|TTC19|AHCTF1|TUBE1|SMC3	BL_vs_Day22
mitochondrial cluster (M235)	0.00301205	0.0214706	-0.620198	-1.82853	14	ALDH18A1|TCHP|EIF2B3|POP5|TMEM218|ALDH6A1|HIBADH	BL_vs_Day22
T cell surface signature (S0)	0.00287356	0.0214706	-0.68758	-2.35725	23	SLC38A1|CD3G|CD6|SIRPG|CD3E|CLEC2D|CD2|CD28|SIT1|CD320|CXCR6|GPR171|ITM2A|LAG3|LRRN3|MAL	BL_vs_Day22
NK cell surface signature (S1)	0.00278552	0.0214706	-0.650728	-2.47511	32	ENPP5|NCR1|TGFBR3|S1PR5|IL2RB|PTGDR|GPR82|CX3CR1|FASLG|KIR3DL1|ELOVL6|KIR2DL3|PDGFRB|ADRB2|KIR2DL1|PTGER2|KLRF1|NCAM1|KLRK1	BL_vs_Day22
B cell surface signature (S2)	0.00280112	0.0214706	-0.492957	-2.08771	49	FCRL3|PLD4|CD72|CD79B|LY9|CXCR5|CD22|IL5RA|NT5E|CD180|CD79A|CELSR1|ITM2C|TLR10|TMEM156|GP5|SGCE|TSPAN13|CCR9|CD19|P2RX5|CD24|MS4A1|PCDH9|BTLA|FCRL2|CCR6|ABCB4	BL_vs_Day22
Monocyte surface signature (S4)	0.00277778	0.0214706	0.609882	2.75476	79	MCTP1|DYSF|NFAM1|BRI3|SLC16A3|PYCARD|AGTRAP|S1PR3|MBOAT7|MS4A6A|FPR1|KCNE3|CSF3R|PTPRE|CD33|TMEM154|FCGR1B|ASGR2|TLR2|LILRB2|FCGR2A|LILRB3|TLR4|FPR2|FCAR|SIRPB1|VNN2|LTBR|P2RY13|CCR2|IL6R|MARCO|LILRB1|TREM1|CD36|PTAFR|FCGRT|TMTC2|TLR1|SLC40A1|SLC11A1|STEAP4|ITGAM|MFSD1|IL1R2|SLC7A7|C1orf162|SIGLEC9|MGAM|TMEM71|CCR1	BL_vs_Day22
DC surface signature (S5)	0.00295858	0.0214706	0.47835	1.9189	47	FZD5|PRRG4|SLAMF8|JAG1|CXCL16|CCRL2|ATP1B2|GRINA|LAMP2|CSF2RB|IL1R1|P2RY6|TMEM158|LHFPL2|CD274|ALCAM|ITPRIPL2|CD58|AGPAT3|PSEN2|CLDN23|ADAM9|ABCC3|CRIM1|SPINT2|DENND1B	BL_vs_Day22
CD4 T cell surface signature Th2-stimulated (S7)	0.00578035	0.0266742	-0.718656	-1.92496	10	CD3G|CD28|SIT1|GPR171|ITM2A|SLC4A7|MAL	BL_vs_Day22
Activated (LPS) dendritic cell surface signature (S11)	0.00273224	0.0214706	0.704076	2.47207	25	PRRG4|CD40|TMEM140|SLC31A2|ELOVL7|IFI27|LAMP2|CSF2RB|NINJ1|SLC43A2|LY75|CD274|TNFSF13B|ANTXR2|CD58|F11R	BL_vs_Day22
cell cycle and transcription (M4.0)	0.00255754	0.0243223	0.455168	2.26948	225	NCF1C|IFI30|UBE2S|FCGR1B|FCGR1A|ASGR1|APOBEC3A|FCER1G|TNFAIP2|SECTM1|NCF1|TYMP|TFEC|CFD|CYBB|MAFB|PLAUR|NOD2|CD33|IL1RN|CDT1|AIF1|IGSF6|HPSE|MYOF|FES|SORT1|LMO2|CTSH|LMNB1|TYROBP|MS4A6A|SLC31A2|UBE2C|HSPA6|ASGR2|SLC7A7|BUB1|MTMR11|CLEC7A|CST3|CD1D|RTN1|DMXL2|FGR|ALDH2|MARCKS|EPB41L3|CDCA5|TK1|LILRB3|PLBD1|FCGR2A|AURKB|TLR8|CEACAM8|SLC15A3|CD300LF|CCR1|CSTA|FGL2|RMI1|TLR4|IL13RA1|CCNB1|BRCA1|SCPEP…	BL_vs_Day23
myeloid cell enriched receptors and transporters (M4.3)	0.00268097	0.0243223	0.666139	2.27506	27	ASGR1|GPBAR1|SECTM1|IGSF6|MYOF|MARCO|SLC7A7|MTMR11|CD1D|SLC2A6|TLR5|TLR8|SLC15A3|CCR1|KCTD12|SLC8A1|LRRC25	BL_vs_Day23
cell division - E2F transcription network (M4.8)	0.00307692	0.0243223	-0.714469	-2.00853	14	TIMELESS|PRKDC|MCM3|CASP2|DNMT1|MCM2|MCM4	BL_vs_Day23
enriched in T cells (I) (M7.0)	0.00289017	0.0243223	-0.657487	-2.69886	56	XCL2|PRF1|IL7R|TIGIT|NELL2|SH2D1A|PRKCH|CD247|GZMB|SAMD3|ETS1|GATA3|GZMA|GZMK|RASGRP1|EOMES|BCL11B|LEF1|GNLY|ITM2A|CD96|CD2|ITK|CCL5|XCL1|LCK|ZAP70|SLA2|RORA|KLRB1|PRKCQ|IL32|TRAV20|TRAC|CD3G|CD3E|CD3D|NKG7|GZMH|CD27|TRBC1	BL_vs_Day23
T cell activation (I) (M7.1)	0.00289017	0.0243223	-0.625265	-2.51798	50	IL7R|TIGIT|PRKCH|CD247|PTPN22|GATA3|TCF7|RASGRP1|EOMES|BCL11B|LEF1|ITPR3|IL21R|CD2|ITK|CCL5|DPP4|LCK|ZAP70|SLA2|CD5|CD8A|TXK|RORA|PRKCQ|THEMIS|CAMK4|TRAC|CRTAM|CD3G|SLAMF1|IKZF1|CD3E|CD3D	BL_vs_Day23
enriched in NK cells (I) (M7.2)	0.00294985	0.0243223	-0.734416	-2.8521	45	KLRC1|TGFBR3|XCL2|PRF1|IL2RB|CTSW|HOPX|PRKCH|CD247|GZMB|SAMD3|KLRF1|FGFBP2|GZMA|ARL4C|KLRD1|STAT4|PTGDR|EOMES|TBX21|GNLY|S1PR5|CLIC3|CD96|SH2D2A|ITK|CCL5|XCL1|ZAP70|RORA|FASLG|KLRB1|MYBL1|PRKCQ	BL_vs_Day23
T cell activation (III) (M7.4)	0.00304878	0.0243223	-0.811788	-2.24761	13	ZMYND11|NELL2|ETS1|RASGRP1|ATP8B2|LEF1|CD96|LCK|RORA|PRKCQ|THEMIS|CAMK4	BL_vs_Day23
E2F1 targets (Q3) (M10.0)	0.00291545	0.0243223	-0.592637	-1.93415	23	MCM6|OSBPL7|NR3C2|GMNN|MCM2|ZNF367|STMN1|UNG|MCM4|FBXO5|MAP4K1	BL_vs_Day23
enriched in monocytes (II) (M11.0)	0.00251256	0.0243223	0.538098	2.61725	177	NCF1C|IFI30|FCGR1B|FCGR1A|ASGR1|FCER1G|TNFAIP2|SECTM1|NCF1|TYMP|TFEC|CFD|CYBB|MAFB|PLAUR|NOD2|CD33|AIF1|IGSF6|HPSE|MYOF|FES|SORT1|LMO2|CTSH|TYROBP|MS4A6A|SLC31A2|HSPA6|LILRA5|ASGR2|SLC7A7|MTMR11|CLEC7A|CST3|CD1D|RTN1|ALDH1A1|DMXL2|FGR|ALDH2|EPB41L3|SIRPB1|TLR5|LILRB3|PLBD1|FCGR2A|TLR8|ADAP2|HK3|SLC15A3|CCR1|CSTA|FGL2|TLR4|BLVRB|IL13RA1|SCPEP1|TNFSF13|PILRA|HNMT|KYNU|GCA|LILRB1|KLF4|RBM47|HCK|PLXN…	BL_vs_Day23
formyl peptide receptor mediated neutrophil response (M11.2)	0.00568182	0.0358977	0.744352	1.87172	10	NCF1C|SECTM1|IGSF6|FCGR2A|PILRA|NCF2|FPR1|PAK1	BL_vs_Day23
innate activation by cytosolic DNA sensing (M13)	0.00284091	0.0243223	0.770901	1.93848	10	CXCL10|AIM2|IRF7|ZBP1|NFKBIA|IL1B|DDX58	BL_vs_Day23
T cell differentiation (M14)	0.00289017	0.0243223	-0.762846	-2.10317	12	LRRN3|SH2D1A|TCF7|RASGRP1|BCL11B|SPOCK2|NOG|ITK|TXK	BL_vs_Day23
TLR and inflammatory signaling (M16)	0.00276243	0.0243223	0.549159	2.04635	43	FCGR1B|KCNJ2|KCNJ15|FCGR2C|FES|TYROBP|HSPA6|FGR|MYD88|TLR5|LILRB3|TLR8|TLR4|PILRA|TLR1|LILRB1|LILRB2|DYSF|TLR2|FPR2|CSF3R|FPR1|LY96|WDFY3|NCF4|IRAK3|BST1|TLR7|ALOX5	BL_vs_Day23
T cell differentiation via ITK and PKC (M18)	0.00283286	0.0243223	-0.802349	-2.14356	11	SH2D1A|PRKCH|ETS1|ABLIM1|SPOCK2|ITM2A|ITK|FASLG|PRKCQ	BL_vs_Day23
T cell differentiation (Th2) (M19)	0.003003	0.0243223	-0.647302	-1.92517	16	GATA3|GZMK|PKIA|ITM2A|DPP4|LCK|GRAP2|IL32|CD3G|UBASH3A|CD28|TRAT1	BL_vs_Day23
inflammatory response (M33)	0.00284091	0.0243223	0.761452	1.91472	10	FCER1G|AIF1|TYROBP|TLR4|ARRB2|TNFSF13|GPX1	BL_vs_Day23
cytoskeletal remodeling (enriched for SRF targets) (M34)	0.00282486	0.0243223	-0.848572	-1.91223	7	VCL|THBS1|MYLK|TPM1|CALD1	BL_vs_Day23
immune activation - generic cluster (M37.0)	0.0026178	0.0243223	0.292919	1.47362	254	MMP8|GPR84|CIITA|STX11|GPBAR1|UPP1|VSIG10|CEACAM1|TNFAIP6|SLC26A8|KCNJ15|B3GNT5|HP|FCGR2C|KLF5|BRCA2|LPCAT2|RETN|CD300C|SLC22A15|LYZ|ANXA3|LILRA5|PRRG4|SAMHD1|RGL1|ALDH1A1|ARHGEF10L|CSF2RB|ROPN1L|SIRPB1|TLR5|MBOAT2|ENTPD1|ADAP2|SLC22A4|GALNT6|HK3|LCN2|MCTP1|BLVRB|SAC3D1|LRRC4|LRRK2|DEFA4|CD72|FCGR3B|G0S2|CTSS|TLR1|VPREB3|RHOU|ELANE|C3AR1|EMILIN2|LGALS3|SCD|ANXA5|LAT2|PLA2G7|SLC8A1|BMX|CD22|CHI3L2…	BL_vs_Day23
cell adhesion (M51)	0.00307692	0.0243223	-0.602613	-1.82038	18	ITGA2B|VWF|THBS1|JAM3|ITGB3|PARVB|TPM1|ENG|MMRN1|ITGB5|SELP|GP1BA|ESAM|ALOX12|ARHGAP6	BL_vs_Day23
inflammasome receptors and signaling (M53)	0.00561798	0.0358977	0.697859	1.84516	12	RIPK2|NOD2|NFKBIA|TLR4|TNFAIP3|BIRC2|PAK1|CARD9|RXRA	BL_vs_Day23
enriched in NK cells (II) (M61.0)	0.00307692	0.0243223	-0.796608	-2.23944	14	TGFBR3|KIR2DL1|KIR3DL1|IL2RB|KIR2DS4|CD247|KLRF1|S1PR5|CD96|KIR2DL3|KLRB1	BL_vs_Day23
enriched in NK cells (KIR cluster) (M61.1)	0.00289855	0.0243223	-0.894751	-1.83627	5	KIR2DL1|KIR3DL1|KIR2DL4|KIR2DS4|KIR2DL3	BL_vs_Day23
enriched in NK cells (receptor activation) (M61.2)	0.00304878	0.0243223	-0.836108	-2.31494	13	KIR2DL1|KIR3DL1|KIR2DL4|CD247|KLRD1|CD244|CD96|ITK|ZAP70|KIR2DL3|CARD11|PRKCQ	BL_vs_Day23
enriched in activated dendritic cells/monocytes (M64)	0.00531915	0.0358977	0.646956	1.85451	15	TNFAIP2|IL1RN|SLC31A2|SOD2|IL1B|MARCKS|DRAM1|SLC15A3|IL13RA1|G0S2|NINJ1	BL_vs_Day23
activated dendritic cells (M67)	0.00284091	0.0243223	0.802053	2.01681	10	SERPING1|IRF7|CD38|PLSCR1|IFIH1|DDX58|DDX60|RSAD2	BL_vs_Day23
RIG-1 like receptor signaling (M68)	0.00295858	0.0243223	0.897312	2.1824	9	CXCL10|IRF7|TRIM25|IFIH1|DHX58|NFKBIA|DDX58|ISG15|TNF	BL_vs_Day23
antiviral IFN signature (M75)	0.0027027	0.0243223	0.735257	2.3387	21	C1QB|CXCL10|SERPING1|IRF7|PML|ANXA3|IFIH1|DHX58|IL1B|DDX58|OAS1|BCL3|OAS3|DDX60|RSAD2|ELANE	BL_vs_Day23
chemokines and inflammatory molecules in myeloid cells (M86.0)	0.00542005	0.0358977	0.611941	1.77919	16	TNFAIP6|GCH1|SLAMF7|NFKBIA|IL1B|TNF|TNFAIP3|G0S2|PDE4B|DUSP1	BL_vs_Day23
transmembrane transport (I) (M87)	0.00265252	0.0243223	0.719532	2.27068	20	ATP1B2|SLC31A2|SLC7A7|SLC4A1|SLC22A4|HK3|SLC15A3|TLR4|VDR|AQP1|CD36|SLC14A1|TLR2	BL_vs_Day23
enriched in antigen presentation (II) (M95.0)	0.00542005	0.0358977	0.664343	1.93154	16	IRF8|AIF1|PLEK|CD53|SELL|FGL2	BL_vs_Day23
enriched in antigen presentation (III) (M95.1)	0.00292398	0.0243223	0.805893	1.88243	8	ICAM1|AIF1|PLEK|CD53	BL_vs_Day23
viral sensing & immunity; IRF2 targets network (I) (M111.0)	0.00271003	0.0243223	0.740004	2.15152	16	TAP1|PSMB8|RIPK2|TNFSF13B|BST2|IFI35|ZBP1|AIF1|FES|CXCL16|KYNU|CTSS	BL_vs_Day23
viral sensing & immunity; IRF2 targets network (II) (M111.1)	0.00286533	0.0243223	0.868037	2.22395	11	TAP1|PSMB10|CXCL10|PSMB8|TNFSF13B|BST2|CASP1|ZBP1|DDX58|IFIT2	BL_vs_Day23
enriched in monocytes (IV) (M118.0)	0.0028169	0.0243223	0.481718	1.80011	44	SMARCD3|TNFSF13B|LTBR|LYZ|C1orf162|SAMHD1|ARHGEF10L|HHEX|LRRK2|CTSS|TLR1|RHOU|EMILIN2|DPYD|LGALS3|BCL6|DYSF|DUSP6|LY96|MPP1|PAK1|TNFRSF1B|CARD9|PID1	BL_vs_Day23
enriched in membrane proteins (M124)	0.00542005	0.0358977	0.676388	1.96656	16	HP|TGM2|SLC4A1|ALAS2|CD24|SNCA|ELANE|C3AR1|AQP1	BL_vs_Day23
type I interferon response (M127)	0.00280899	0.0243223	0.781808	2.06712	12	TAP1|IFITM1|IRF7|STAT1|PARP9|PLSCR1|IFIH1|DDX60|RSAD2	BL_vs_Day23
enriched in G-protein coupled receptors (M130)	0.00571429	0.0358977	-0.728574	-1.88018	10	F2R|PTGDR|S1PR5|ITPR3|CCL5|XCL1|ADRB2|PTGER2|GPR18	BL_vs_Day23
lysosomal/endosomal proteins (M139)	0.00568182	0.0358977	0.747818	1.88043	10	NPC2|CTSB|SORT1|CTSH|AP1S2|CTSS	BL_vs_Day23
innate antiviral response (M150)	0.00280899	0.0243223	0.77878	2.05911	12	TAP1|APOBEC3A|IRF7|PLSCR1|OAS1|SP100|OASL|OAS3|RSAD2	BL_vs_Day23
enriched in activated dendritic cells (II) (M165)	0.0027027	0.0243223	0.568302	1.94555	28	DOCK4|TNFAIP6|SERPING1|LAMP3|PARP9|IFIH1|PRRG4|CSF2RB|IFIT3|IFIT2|RSAD2|HLX|MX2|RBM47|IL18|HERC5|IFI27	BL_vs_Day23
heme biosynthesis (I) (M171)	0.00573066	0.0358977	0.720537	1.84605	11	ALAS2|AHSP|FECH|GATA1|HMBS|E2F2|TMOD1|PLEK2	BL_vs_Day23
erythrocyte differentiation (M173)	0.00295858	0.0243223	0.783713	1.90611	9	BPGM|EPB42|LYL1|KLF1|GATA1|HMBS|TRIM10|FHL2	BL_vs_Day23
platelet activation - actin binding (M196)	0.00304878	0.0243223	-0.684321	-1.89469	13	ITGA2B|THBS1|ITGB3|TPM1|ITGB5|TPM4|PDE5A|PROS1|MPL|ARHGAP6	BL_vs_Day23
lysosome (M209)	0.00287356	0.0243223	0.821014	1.8476	7	GM2A|CTSZ|CTSB|SORT1|GNS	BL_vs_Day23
respiratory electron transport chain (mitochondrion) (M219)	0.00531915	0.0358977	0.607551	1.80555	17	COX8A|CYC1|COX5B|COX5A|COX6B1|UQCRC2|UQCRFS1|UQCRC1|UQCR10	BL_vs_Day23
heme biosynthesis (II) (M222)	0.00284091	0.0243223	0.79349	1.99528	10	YPEL4|BLVRB|KLF1|RHCE|UROD|HMBS|TRIM10	BL_vs_Day23
enriched in T cells (II) (M223)	0.00289017	0.0243223	-0.791265	-2.18152	12	LRRN3|TRGC2|HOPX|FGFBP2|CLEC2D|SLC38A1|DPP4|TC2N|CD40LG	BL_vs_Day23
T cell surface signature (S0)	0.00291545	0.0243223	-0.543086	-1.77243	23	LRRN3|CXCR6|CLEC2D|SLC38A1|ITM2A|CD2|NDFIP2|TMEM106C|SLC37A3|CD3G|CD3E	BL_vs_Day23
NK cell surface signature (S1)	0.00288184	0.0243223	-0.661889	-2.38595	32	TGFBR3|KIR2DL1|KIR3DL1|ATP9A|IL2RB|SLCO4C1|KIR2DS4|KLRF1|NCR1|PTGDR|NCAM1|S1PR5|CX3CR1|KIR2DL3|SYNGR3|FASLG|ADRB2|GPR82|PTGER2|ENPP5	BL_vs_Day23
Monocyte surface signature (S4)	0.00534759	0.0358977	0.437926	1.85857	79	FCGR1B|ASGR1|BRI3|NFAM1|CD33|LTBR|MARCO|MS4A6A|AGTRAP|C1orf162|ASGR2|SLC7A7|SIRPB1|TLR5|LILRB3|FCGR2A|CCR2|CCR1|MCTP1|TLR4|TLR1|LILRB1|CD36|FCGRT|LILRB2|PYCARD|DYSF|TLR2|FPR2|KCNE3|SLC16A3|CSF3R|MBOAT7|FPR1	BL_vs_Day23
DC surface signature (S5)	0.00289017	0.0243223	0.526573	1.99239	47	FZD5|CD274|SLAMF8|ITPRIPL2|CCRL2|P2RY6|ATP1B2|GRINA|LHFPL2|KMO|AGPAT3|CXCL16|TMEM158|CLDN23|PRRG4|CSF2RB|ALCAM	BL_vs_Day23
Activated (LPS) dendritic cell surface signature (S11)	0.00268817	0.0243223	0.574549	1.91556	25	CD40|CD274|TNFSF13B|TMEM140|SLC31A2|PRRG4|CSF2RB|IL13RA1|SGPP2|IL3RA|NINJ1|IFI6|IFI27|SLC43A2	BL_vs_Day23
E2F transcription factor network (M8)	0.00285714	0.0447801	0.89162	1.92617	6	UBE2C|E2F1|E2F2	BL_vs_Day28
enriched in B cells (I) (M47.0)	0.00282486	0.0447801	-0.659671	-2.51963	41	PLEKHG1|ABCB4|TCF4|TSPAN13|BCL11A|PAX5|KLHL14|AFF3|CR2|EBF1|FCRLA|IGHD|TCL1A|CD72|CD22|RALGPS2|IGHM|BANK1|FCRL5|E2F5|CXCR5|SPIB|PCDH9|PNOC|BTLA|FCER2|FCRL1	BL_vs_Day28
enriched in B cells (II) (M47.1)	0.00276243	0.0447801	-0.678137	-2.4707	34	PLEKHG1|KLF8|TCF4|BCL11A|PAX5|KLHL14|CD180|CELSR1|CR2|TPD52|EBF1|FCRLA|TCL1A|CDK14|PAWR|RALGPS2|IGHM|BANK1|FCRL5|CXCR5|DENND5B|PNOC|FCGR2B	BL_vs_Day28
enriched in B cells (III) (M47.2)	0.00289855	0.0447801	-0.683295	-2.19437	22	MEF2C|CD180|CELSR1|TPD52|FCRLA|IGHD|CDK14|PAWR|BTK|TBC1D9|FCRL5|DENND5B|PNOC|FCGR2B|CD69	BL_vs_Day28
transcription regulation in cell development (M49)	0.00294118	0.0447801	0.546514	2.05341	37	KLF1|FHL2|SPTB|EPB42|ACHE|TAL1|TMOD1|GATA1|TYROBP|CCNB1|ANK1|CDC20|FES|RXRA|MYH10|LST1	BL_vs_Day28
cell adhesion (M51)	0.00280112	0.0447801	0.613817	1.89768	18	ESAM|SLAMF7|GP9|ITGB5|ALOX12|ARHGAP6|THBS1|ITGA2B|MMRN1|TPM1|GP1BA|SELP|ITGB3	BL_vs_Day28
enriched in B cells (VI) (M69)	0.00289855	0.0447801	-0.610967	-1.86636	18	ABCB4|TSPAN13|CR2|CD72|CD22|CXCR5|PCDH9|BTLA|FCRL1|MS4A1|CD19|CD200	BL_vs_Day28
enriched in membrane proteins (M124)	0.00277778	0.0447801	0.71015	2.11001	16	SNCA|SLC4A1|TGM2|ALAS2|ELANE|HP|AQP1|KCNH2	BL_vs_Day28
nuclear pore, transport; mRNA splicing, processing (M143)	0.00283286	0.0447801	-0.824017	-2.13403	10	NUP205|NUP160|NUP155|NUP133|SEH1L|NCBP2	BL_vs_Day28
enriched in cell cycle (M167)	0.00275482	0.0447801	0.714369	2.08518	15	GSPT1|RBM38|CDC34|BCL2L1|STRADB|SESN3	BL_vs_Day28
heme biosynthesis (I) (M171)	0.00291545	0.0447801	0.907421	2.36293	11	AHSP|PLEK2|ALAS2|TMOD1|FECH|GATA1|HMBS|E2F2|HEMGN	BL_vs_Day28
erythrocyte differentiation (M173)	0.00296736	0.0447801	0.929229	2.29887	9	KLF1|BPGM|FHL2|EPB42|TRIM10|LYL1|GATA1|HMBS	BL_vs_Day28
heme biosynthesis (II) (M222)	0.00286533	0.0447801	0.787443	2.01711	10	KLF1|BLVRB|TRIM10|HMBS|UROD|PPOX	BL_vs_Day28
transcription elongation, RNA polymerase II (M234)	0.00291545	0.0447801	0.804356	2.09455	11	NDUFB10|POLR2J|AURKAIP1|POLR2E|NDUFA3|NDUFB11|POLR2L|UQCR10|MEA1|POLR2I|UQCRQ	BL_vs_Day28
B cell surface signature (S2)	0.00265957	0.0447801	-0.458994	-1.84647	49	SGCE|ABCB4|TSPAN13|TLR10|CD180|CELSR1|CR2|CNTNAP3|CD72|CD22|PLD4|EGF|JAM3|CCR6|FCRL5|CCR9|CXCR5|PCDH9|BTLA|FCGR2B|TMEM156|FCRL1|MS4A1|NT5E|CD19|LY9|CD200|CD52	BL_vs_Day28
