# Supplementary material for: Systems biological assessment of human immunity to BNT162b2 mRNA vaccination
Source: Res Sq. 2021 Apr 22:rs.3.rs-438662. Preprint. [Version 1] doi: 10.21203/rs.3.rs-438662/v1 (PMC8132234; doi:10.21203/rs.3.rs-438662/v1)
Supplement: Supplement 2 [file 97e648d99d8b6aa64c44bcec.xlsx]

## Sheet: Sheet1
Bead ID	Antigen
1	Bare Bead
2	Human IgG from serum
3	Anti-Human IgG Fc fragment Specific
4	Anti-Human IgG (H+L)
5	Anti-Human IgG F(ab') fragment specific
6	CD74
7	IFN-lambda2
10	IL-1alpha
13	IFN-alpha1
14	IFN-alpha7
16	IFN-alpha10
18	IFN-alpha8
19	IFN-alpha6
20	IL-2
21	IL-4
22	IL-13
23	IL-21
24	Fractalkine/CX3CL1
25	IP-10/CXCL10
26	IL-31
27	IL-6
28	MCP-2/CCL8
29	OSM
30	IL-11
31	SDF-1a/CXCL12
32	IL-27
33	CNTF
34	CT-2
38	GM-CSF
39	IFN-alpha2
40	IFN-beta
41	IFN-gamma
42	IFN-epsilon
43	IFN-lambda1
44	IFN-lambda3
45	IFN-omega
46	IL-10
47	IL-12p40
48	IL-12p70
49	IL-15
50	IL-17F
51	IL-1beta
52	IL-22
55	TNF-alpha
56	TNF-beta
58	ACE2
59	Eotaxin
60	Eotaxin 2
62	IL-17A
63	IL-33
64	IL-7
65	MIP-1alpha
67	PDGFBB
68	sRANK-ligand
69	TIFI-gamma
70	CRP
71	MPO
73	C3a
76	Gal-9
77	LIF
78	VEGFB
79	HTRA1
80	d-dimer
