# Supplementary material for: Systems biological assessment of human immunity to BNT162b2 mRNA vaccination
Source: Res Sq. 2021 Apr 22:rs.3.rs-438662. Preprint. [Version 1] doi: 10.21203/rs.3.rs-438662/v1 (PMC8132234; doi:10.21203/rs.3.rs-438662/v1)
Supplement: Supplement 3 [file 44a060e4c236f02934d9d4b4.xlsx]

## Sheet: Sheet1
Bead ID	Antigen
1	Bare Bead
2	Human IgG from serum
3	Anti-Human IgG Fc fragment Specific
4	Anti-Human IgG (H+L)
5	Anti-Human IgG F(ab') fragment specific
6	Beta 2 Glycoprotein 1
7	Myeloperoxidase
8	La/SSB
10	Proteinase 3
11	Histone 1
12	Histone 2A and 4
13	Histone 2B
14	CENP B
15	Histone 3
16	Histones
17	GBM
18	C1q
19	BPI
24	Fibrillarin
26	IA2
27	GAD65
31	U11/U12
38	CENP A
39	EJ
40	HSP 70
41	HSP 90
42	Intrinsic Factor
43	JO1
44	Ku, p70/p80
45	LKM1
46	MDA5
47	MI-2
48	PCNA
49	PL-12
50	PL-7
51	PM/Scl-75
52	Nucleolin
53	Ribo P0
54	Ribo P1
55	PDC-E2
56	Ribo P2
57	SRP54
58	PM/Scl 100
59	POLR3H
60	PDH
62	Ro60
65	Scl-70
67	Sm/RNP
68	Smith
70	Troponin I
72	PDIA2
73	TG
74	GNAL
75	MYH6
76	TPO
77	ZnT8
79	U1-snRNP A
80	U1-snRNP C
83	RPP25 (Th/To)
84	Insulin
